# Supplementary material for: Synthesis, crystal molecular structure, and magnetic characteristics of coordination polymers formed by Co(ii) diketonates with pentaheterocyclic triphenodioxazines
Source: Royal Society of Chemistry journal article supplement (doi:10.1039/d0nj05279e), 2020-11-21
Supplement: d0nj05279e2.pdf [file d0nj05279e2.pdf]

Electronic Supplementary Material (ESI) for *New Journal of Chemistry*.

This journal is © The Royal Society of Chemistry and the Centre National de la Recherche Scientifique
